# Supplementary material
Source: HighWire-hosted journal article supplement (https://openheart.bmj.com/content/6/1/e000958)
Supplement: inline-supplementary-material-1 [file inline-supplementary-material-1.docx]

**Supplementary Table 1.** Baseline electrocardiographic R-R dispersion in ischemic versus non-ischemic heart disease subgroups, stratified by post-ablation response in left ventricular ejection fraction (>7.5%).

|  | **Ischemic Heart Disease** | | | **No Ischemic Heart Disease** | | |
| --- | --- | --- | --- | --- | --- | --- |
| n | R-R dispersion | P-value | n | R-R dispersion | P-value |
| LVEF Improved (n=30) | 11 | 632±206 ms | 0.48 | 19 | 652±123 ms | <0.01 |
| LVEF Not Improved (n=22) | 11 | 569±174 ms | 11 | 512±139 ms |

LVEF, left ventricular ejection fraction
